# Supplementary material for: Buckyball C60/Fe–N4 superstructured electrodes for efficient oxygen reduction reaction
Source: Royal Society of Chemistry journal article supplement (doi:10.1039/d4ta07400a), 2024-12-11
Supplement: d4ta07400a1.pdf [file d4ta07400a1.pdf]

*Supporting information*

**Buckyball C<sub>60</sub>/Fe-N<sub>4</sub> Superstructured Electrodes for Efficient Oxygen  
Reduction Reaction**

*Fancang Meng,<sup>†,‡</sup> Yinhui Zhang,<sup>†,‡</sup> Bohong Jiang,<sup>†</sup> Jiahao Li,<sup>†</sup> Huan Wu,  
† Jianwei Zhao, †† Huihui Kong,<sup>†,\*</sup> Qingmin Ji<sup>†,\*</sup>*

<sup>†</sup> Herbert Gleiter Institute for Nanoscience, School of Materials Science and  
Engineering, Nanjing University of Science & Technology, 200 Xiaolingwei, Nanjing,  
210094, China

<sup>††</sup> Shenzhen Huasuan Technology Co., Ltd.

<sup>‡</sup> These authors contributed this work equally

\* Corresponding author: [jqingmin@njust.edu.cn](mailto:jqingmin@njust.edu.cn), [konghuihui@njust.edu.cn](mailto:konghuihui@njust.edu.cn)

## **Additional experimental information**

**Characterizations.** Scanning electron microscopy (SEM) was performed on FEI Quanta 250FEG field emission scanning electron microscope operating at 15 kV. Transmission electron microscopy (TEM) was operated on a Tecnai G220 at a voltage of 200 kV. Nitrogen sorption measurements were conducted on powder samples at 77K using an Autosorb-1 surface area and pore size analyzer (Gemini VII 2390). The specific surface areas were calculated based on the Brunauer Emmett Teller method (BET). X-ray diffraction (XRD) patterns were measured using a Bruker-AXS D8 Advance diffractometer. Raman spectra were recorded on a scattering Raman spectrometer (Renishaw-invia) using excitation radiation at 514 nm from an Ar<sup>+</sup> ion laser and under the power of 10 mW. Fourier transform infrared (FTIR) spectra were obtained by the FTIR spectrometer Nicolet S10 (Thermo Fisher).

**DFT calculations.** The spin-polarized density functional theories (DFT) were carried out by using the Vienna *Ab initio* Simulation Package (VASP).<sup>s1</sup> The DFT-D3 method is adopted to evaluate the van der Waals (vdW) interaction.<sup>s4</sup> The Perdew-Burke-Ernzerhof generalized-gradient approximation functional was used to describe the interaction between electrons.<sup>s3</sup> All-electron plane-wave basis sets with an energy cutoff of 400 eV. The vacuum region was set to be 15 Å to prevent the interaction

between two adjacent surfaces. The convergence threshold was set at  $1 \times 10^{-5}$  eV in total energy and  $0.02 \text{ eV \AA}^{-1}$  in force on each atom.

The reaction Gibbs free energy ( $\Delta G$ ) is defined as :

$$\Delta G = \Delta E + \Delta E_{ZPE} - T\Delta S \text{ (T=298.15K),}$$

in which  $\Delta E$ , the reaction energy,  $\Delta E_{ZPE}$ , zero-point energies,  $\Delta S$ , the entropy difference from vibrational frequency calculations. The entropy of gas phase are obtained from the NIST database with standard condition.<sup>s4</sup>

#### **References for supporting information**

[s1] G. Kresse, J. Furthmüller, Efficiency of ab-initio total energy calculations for metals and semiconductors using a plane-wave basis set. *Comput. Mater. Sci.*, 1996, 6, 15-50.

[s2] S. Grimme, Semiempirical GGA-type density functional constructed with a long-range dispersion correction. *J. Comput. Chem.* 2006, 27 (15), 1787–1799.

[s3] J. P. Perdew, K. Burke, M. Ernzerhof, Generalized Gradient Approximation Made Simple. *Phys. Rev. L.*, 1996, 77(10), 3865-386.

[s4] Computational Chemistry Comparison and Benchmark Database.  
<http://cccbdb.nist.gov/>

## Additional Data

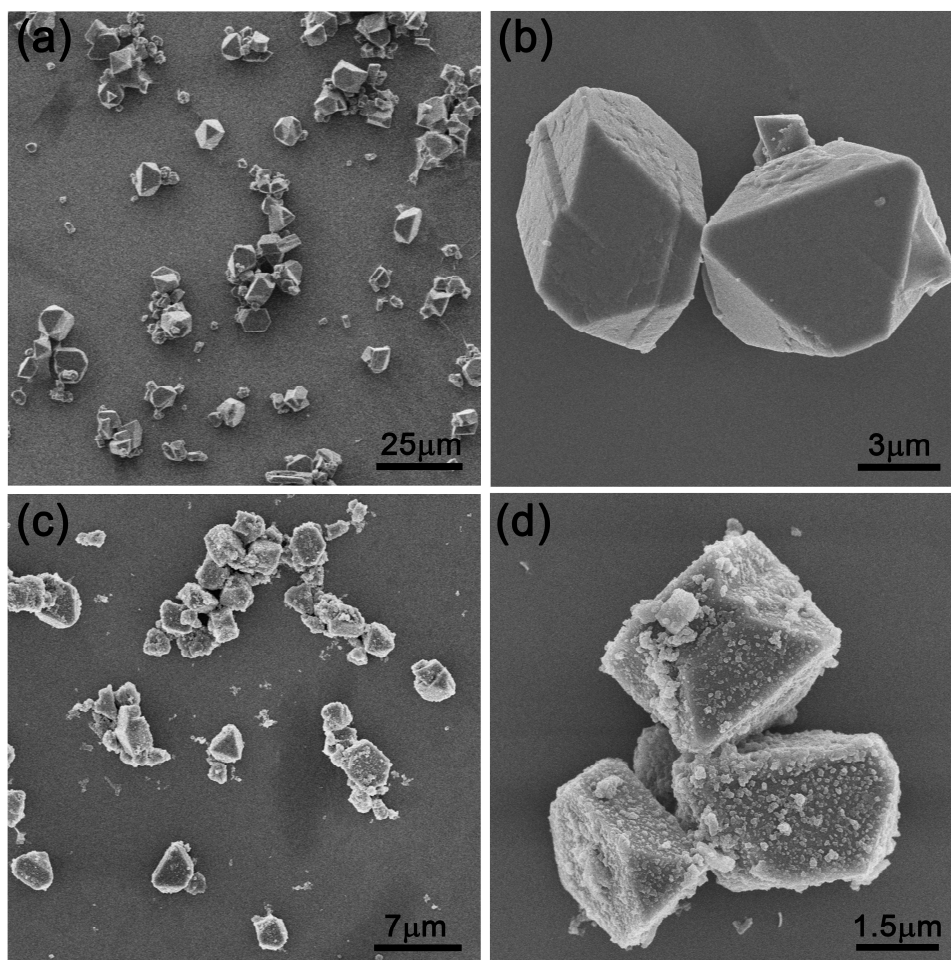

**Figure S1.** The SEM images of (a), (b) C<sub>60</sub> particles by assembly in toluene/DMF mixture, and (c), (d) FePc-C<sub>60</sub> particles by co-assembly in toluene/DMF mixture.

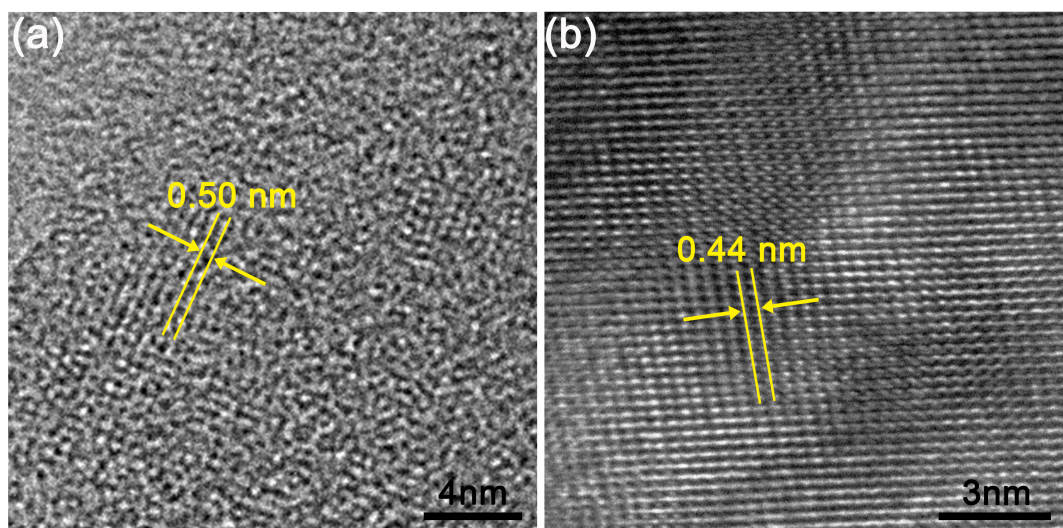

**Figure S2.** The HR-TEM images of (a)  $C_{60}$  particle and (b)  $FePc-C_{60}$  particles.

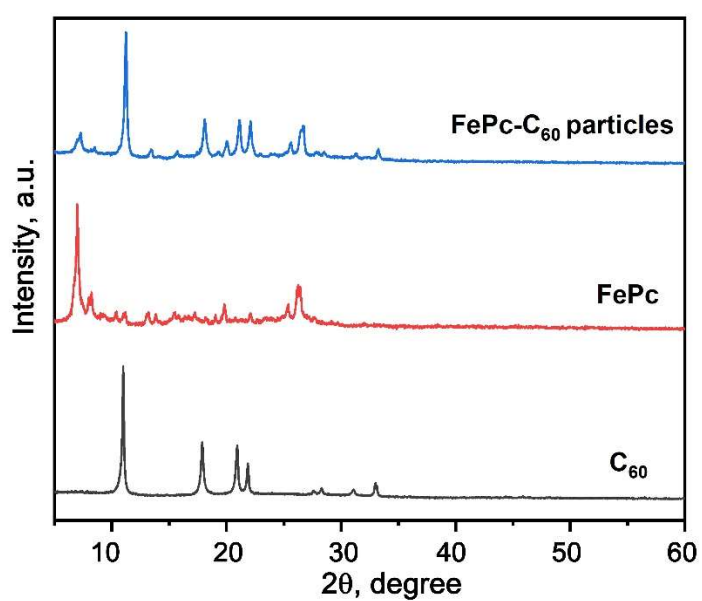

**Figure S3.** The XRD patterns of  $C_{60}$ ,  $FePc$  and  $FePc-C_{60}$  particles.

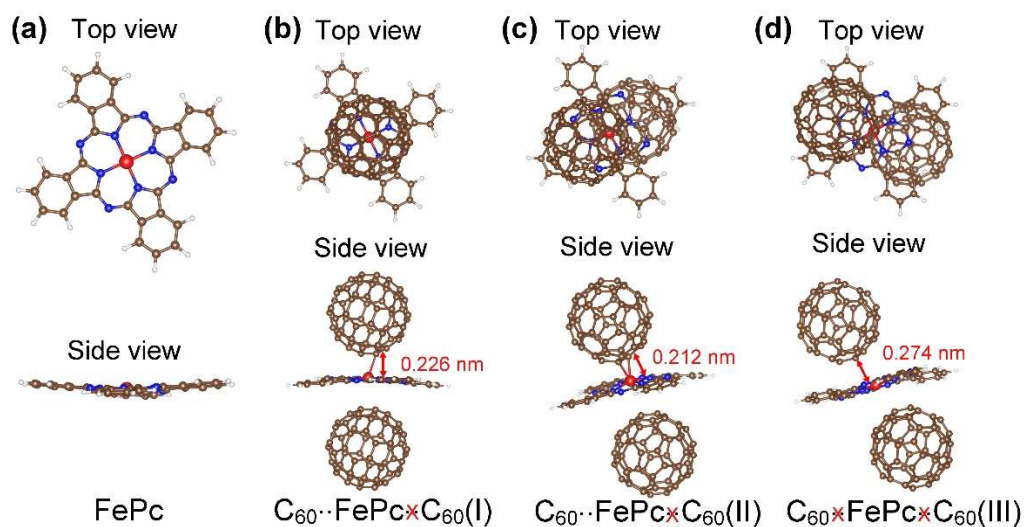

**Figure S4.** (a) The conformation of FePc and the complexation patterns for (b) the coordination of Fe in FePc (Fe@FePc) with pentagon carbon in C<sub>60</sub> (C@C5-C<sub>60</sub>), (c) the coordination of Fe@FePc with C-C@C5-C<sub>60</sub> and (d) the coordination of N@FePc with C@C5-C<sub>60</sub> with the optimal shortest distances based on DFT calculation. Atom color: brown, C; white, H; blue, N; red, Fe.

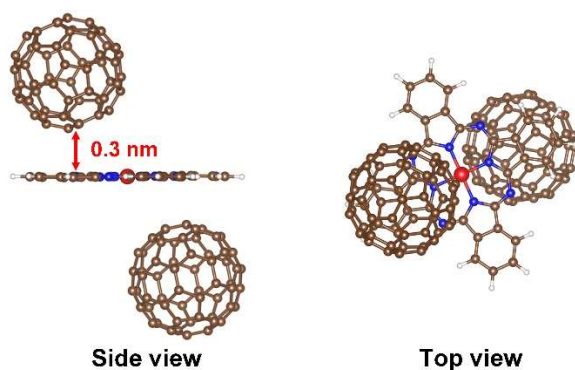

**Figure S5.** The complexation pattern by the coordination of C-C(pyrrole)@FePc with C-C@C<sub>5</sub>-C<sub>60</sub> with the average shortest distances based on DFT calculation. Atom color: brown, C; white, H; blue, N; red, Fe.

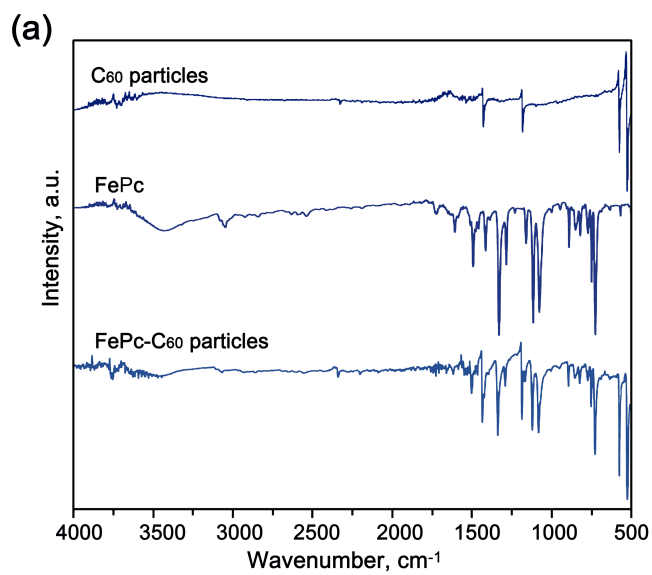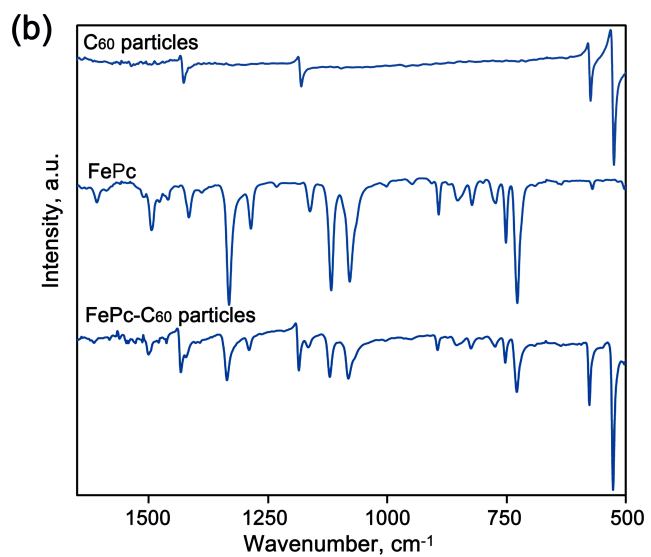

**Figure S6.** The FTIR spectra of  $\text{C}_{60}$  particle, FePc, and FePc- $\text{C}_{60}$  particles.



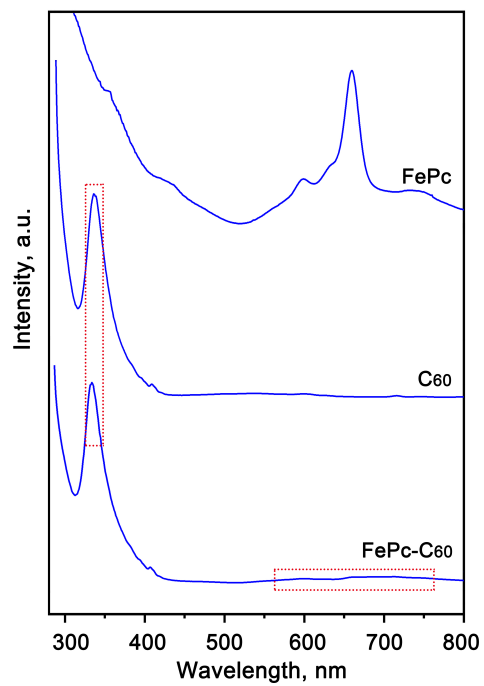

**Figure S7.** The UV-vis spectra of C<sub>60</sub>, FePc, and FePc-C<sub>60</sub>.

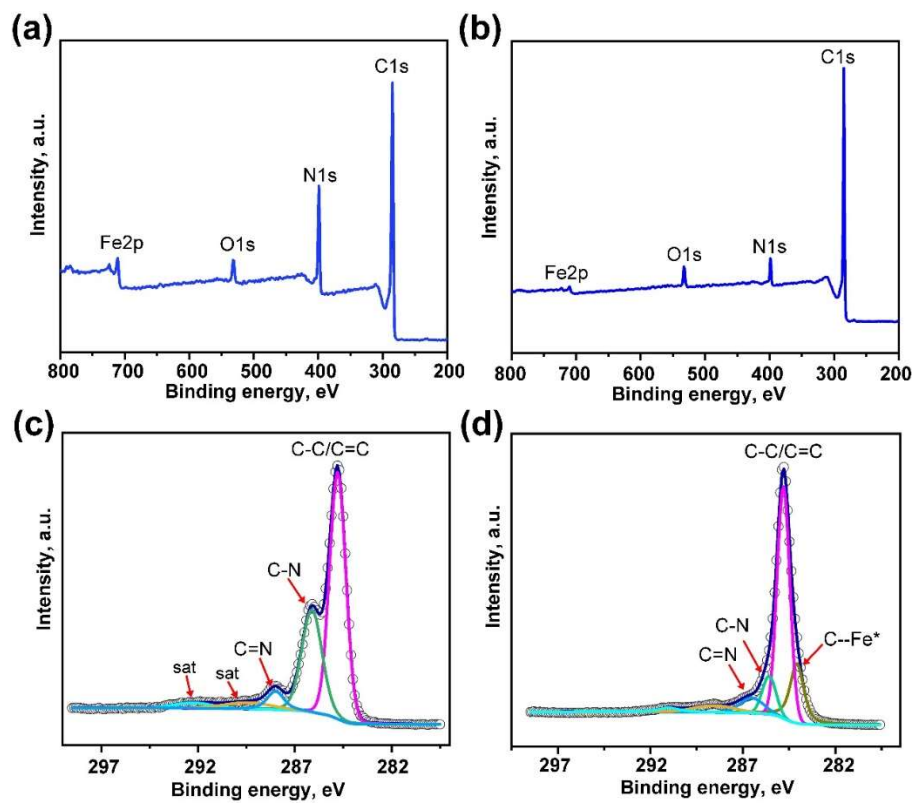

**Figure S8.** (a) The XPS spectrum and (c) C 1s spectrum of FePc. (b) The XPS spectrum and (d) C 1s spectrum of FePc-C<sub>60</sub> particles.

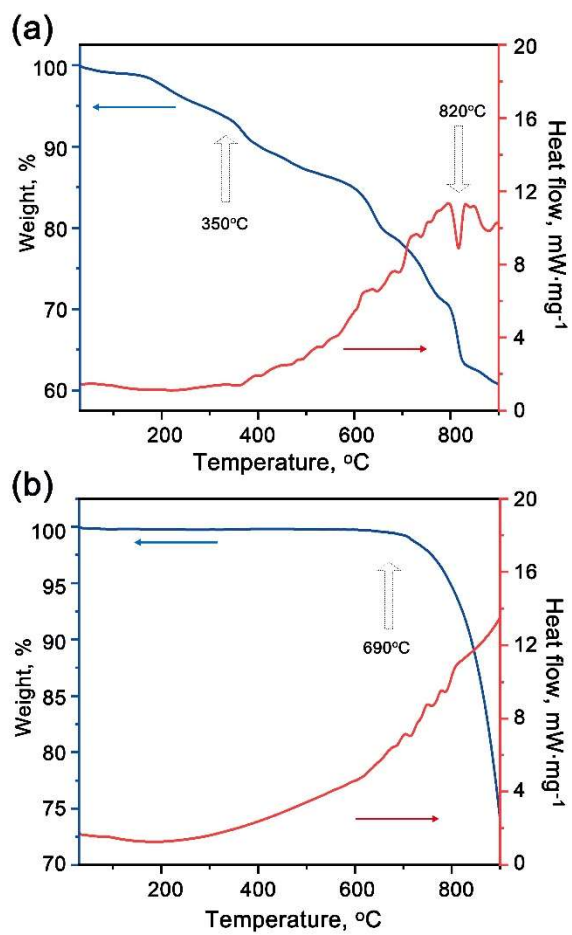

**Figure S9.** The TGA and DSC curves for (a) FePc, and (b) C<sub>60</sub>.

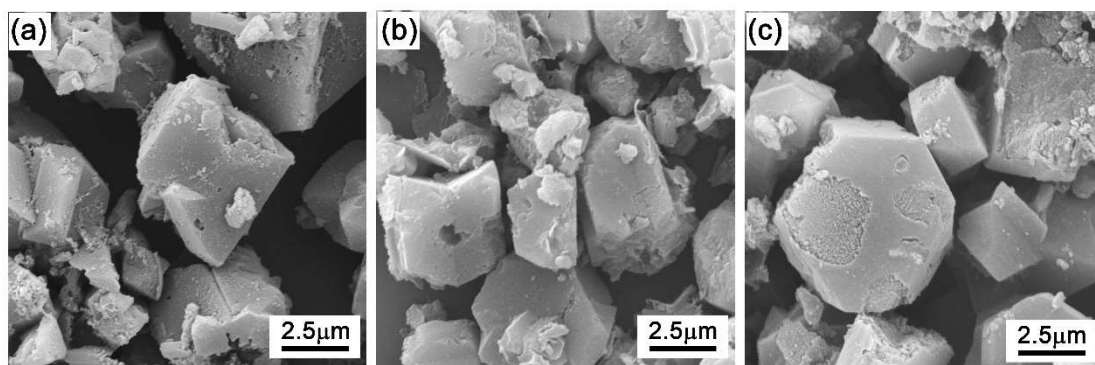

**Figure S10.** The SEM images of (a) FePc-C<sub>60</sub>\_500, (b) FePc-C<sub>60</sub>\_700 and (c) FePc-C<sub>60</sub>\_900.

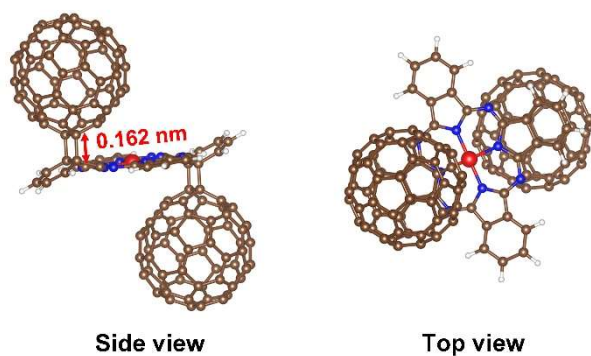

**Figure S11.** The convalent bonding based on the coordination pattern of C-C(pyrrole)@FePc with C-C@C<sub>5</sub>-C<sub>60</sub> with the average shortest distances based on DFT calculation. Atom color: brown, C; white, H; blue, N; red, Fe.

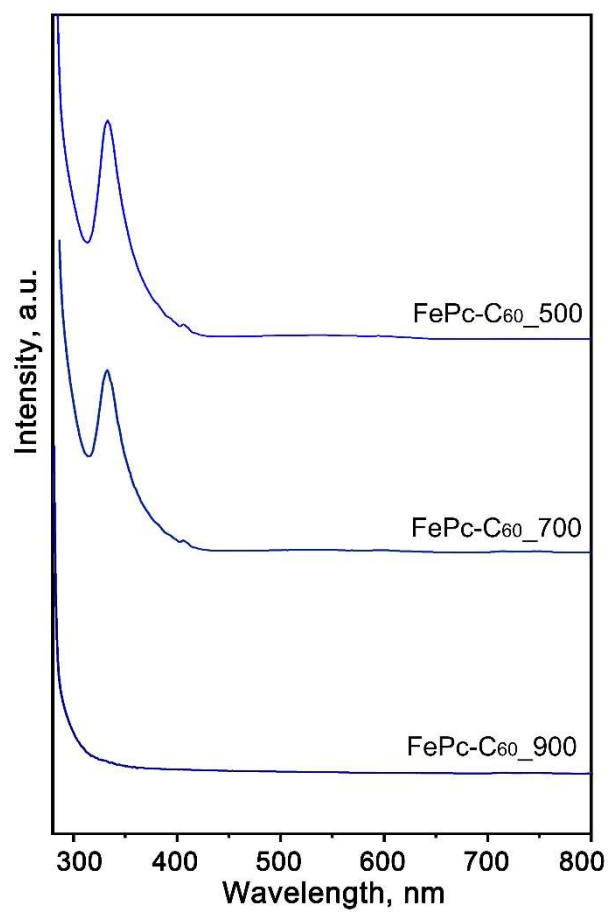

**Figure S12.** The UV-vis spectra of (a) FePc-C<sub>60</sub>\_500, (b) FePc-C<sub>60</sub>\_700, and (c) FePc-C<sub>60</sub>\_900.

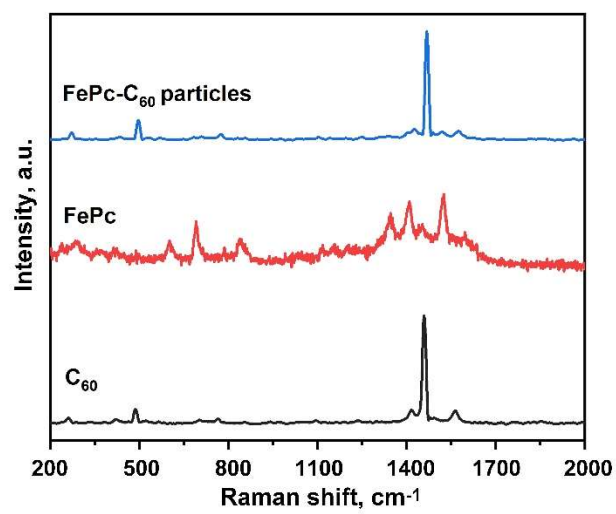

**Figure S13.** The Raman spectra of FePc-C<sub>60</sub> particles, FePc, and C<sub>60</sub>.

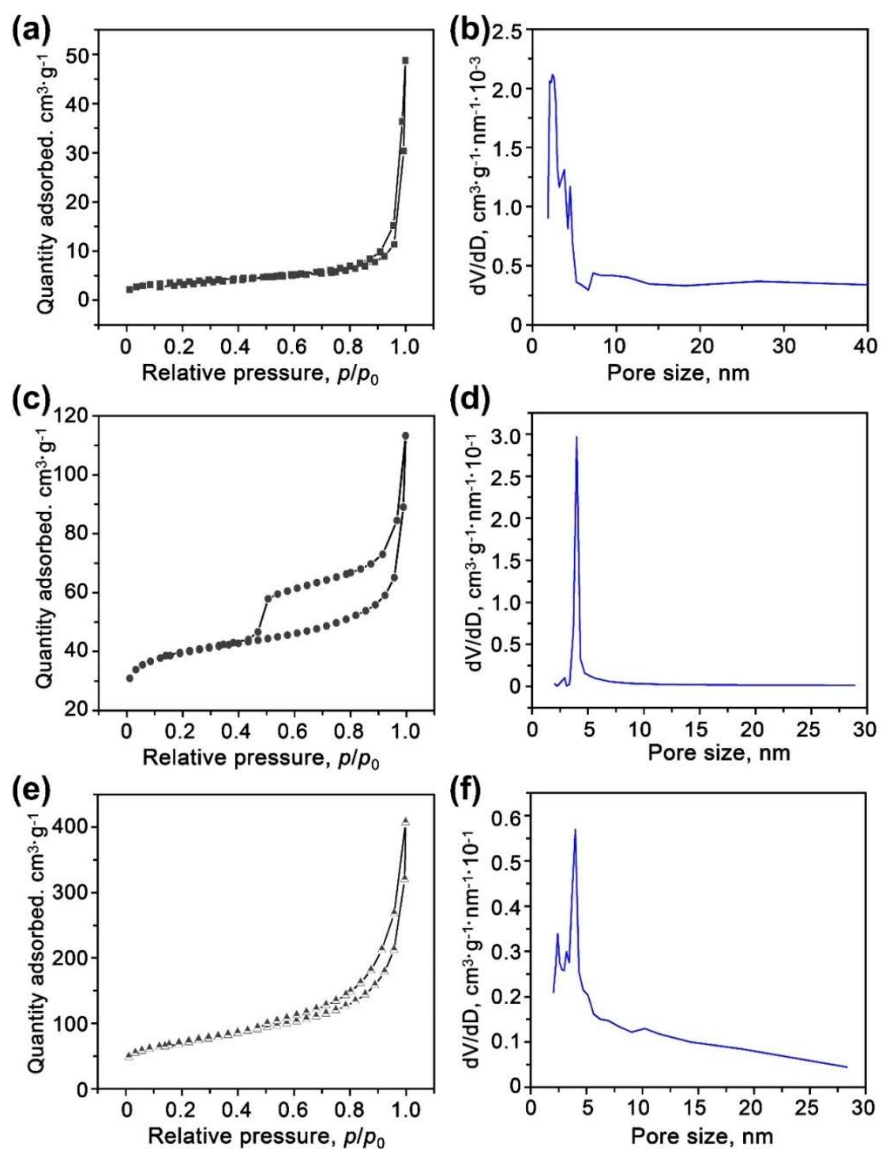

**Figure S14.** The  $N_2$  isotherms of (a) FePc-C<sub>60</sub>\_500, (c) FePc-C<sub>60</sub>\_700, and (e) FePc-C<sub>60</sub>\_900. The pore size distribution of (b) FePc-C<sub>60</sub>\_500, (d) FePc-C<sub>60</sub>\_700, and (f) FePc-C<sub>60</sub>\_900.

**Table S1.** The porous characteristic properties of FePc-C<sub>60</sub> carbon electrodes by nitrogen sorption measurements.

| <b>Sample</b>             | <b>BET surface area<br/>(m<sup>2</sup>·g<sup>-1</sup>)</b> | <b>Average pore size<br/>(nm)</b> | <b>Pore volume<br/>(cm<sup>3</sup>·g<sup>-1</sup>)</b> |
|---------------------------|------------------------------------------------------------|-----------------------------------|--------------------------------------------------------|
| FePc-C <sub>60</sub> _500 | 12.68                                                      | 21.28                             | 0.075                                                  |
| FePc-C <sub>60</sub> _700 | 125.00                                                     | 10.32                             | 0.175                                                  |
| FePc-C <sub>60</sub> _900 | 239.31                                                     | 9.33                              | 0.329                                                  |



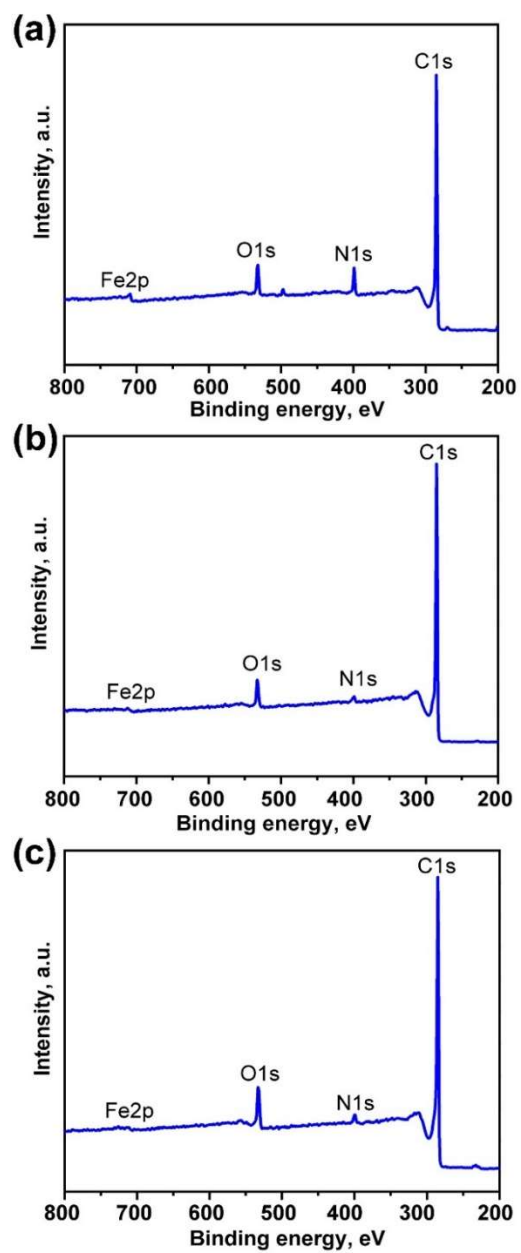

**Figure S15.** The XPS spectra of (a) FePc-C<sub>60</sub>\_500, (b) FePc-C<sub>60</sub>\_700, and (c) FePc-C<sub>60</sub>\_900.

**Table S2.** The calculated proportion of various elements states in FePc-C<sub>60</sub> carbons based on the XPS analysis.

| Samples                   | XPS   |      | Based on N 1s spectra |             |              |                   |                    | Based on Fe 2p spectra             |
|---------------------------|-------|------|-----------------------|-------------|--------------|-------------------|--------------------|------------------------------------|
|                           | N%    | Fe%  | Pyridinic N%          | Pyrrolic N% | Graphitic N% | Fe-N%             | Fe <sub>3</sub> N% | Fe <sup>2+</sup> /Fe <sup>3+</sup> |
| FePc                      | 18.85 | 2.07 | -                     | -           | -            | 81.5 <sup>a</sup> | -                  | 1/0                                |
| FePc-C <sub>60</sub>      | 6.70  | 0.80 | -                     | -           | -            | 75.8 <sup>a</sup> | -                  | 1/0                                |
| FePc-C <sub>60</sub> _500 | 7.12  | 0.94 | -                     | -           | -            | 70.0 <sup>a</sup> | -                  | 1.35                               |
| FePc-C <sub>60</sub> _700 | 2.28  | 0.39 | 12                    | 24.9        | 14.2         | 33.8 <sup>b</sup> | -                  | 0.72                               |
| FePc-C <sub>60</sub> _900 | 2.98  | 0.43 | 10.6                  | 25.7        | 22.8         | 15.2 <sup>b</sup> | 3.3                | 0.55                               |

a: be the form of Fe-N<sub>4</sub> (including pyrrolic N from FePc); b: be the forms of various Fe-N<sub>x</sub>.

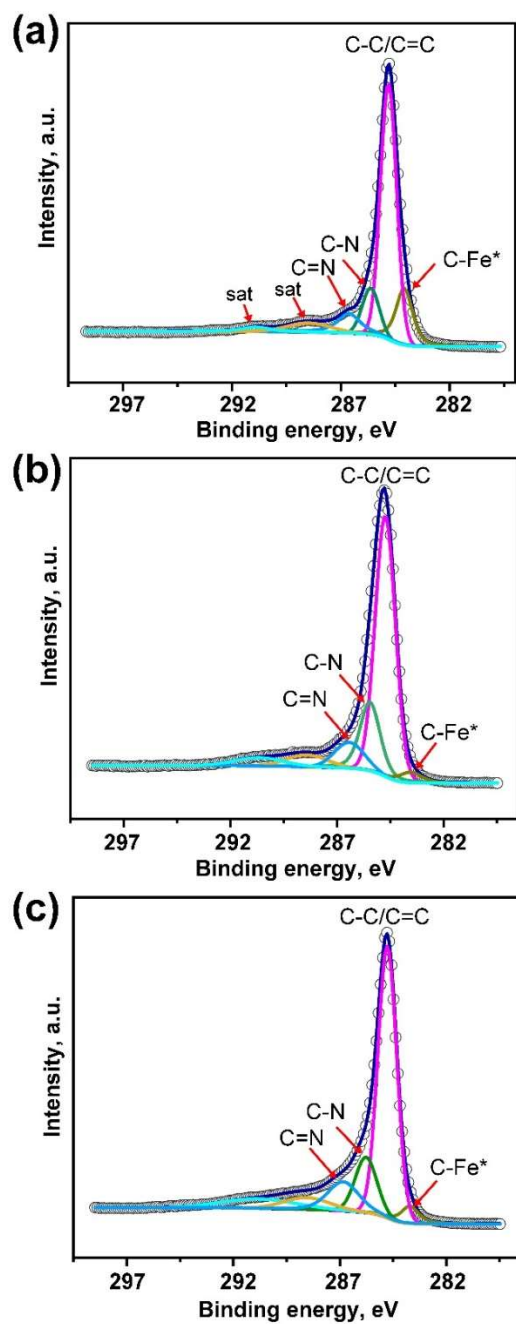

**Figure S16.** The XPS C 1s spectra of (a) FePc-C<sub>60</sub>\_500, (b) FePc-C<sub>60</sub>\_700, and (c) FePc-C<sub>60</sub>\_900.

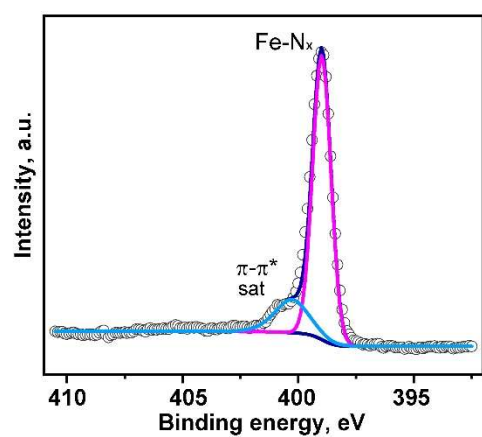

**Figure S17.** The XPS N 1s spectrum of FePc.

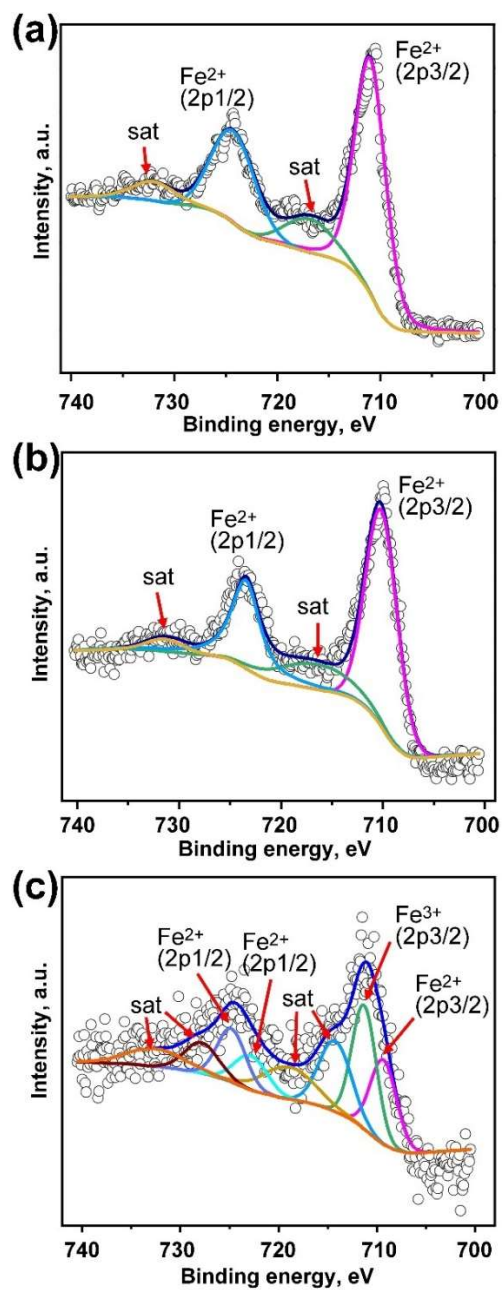

**Figure S18.** The Fe 2p XPS spectra (a) FePc, (b) FePc-C<sub>60</sub>, and (c) FePc-C<sub>60\_700</sub>.

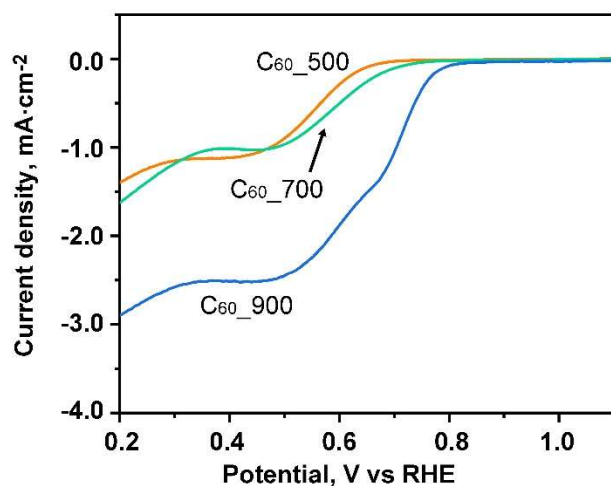

**Figure S19.** The LSV curves of C<sub>60\_500</sub>, C<sub>60\_700</sub> and C<sub>60\_900</sub>.

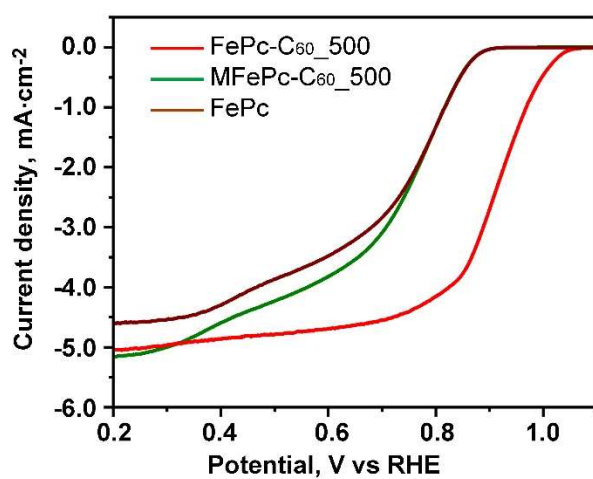

**Figure S20.** The LSV curves of FePc-C<sub>60\_500</sub>, FePc and MFePc-C<sub>60\_500</sub>.

**Table S3.** The comparison of ORR activities of FePc-C<sub>60</sub> carbon electrodes, FePc, and Pt/C.

| <b>Sample</b>              | <b><math>E_0</math> (V)</b> | <b><math>E_{1/2}</math> (V)</b> | <b><math>j_L</math>(mA·cm<sup>-2</sup>)</b> |
|----------------------------|-----------------------------|---------------------------------|---------------------------------------------|
| FePc-C <sub>60</sub> _500  | 1.04                        | 0.91                            | 5.05                                        |
| FePc-C <sub>60</sub> _700  | 0.92                        | 0.73                            | 4.27                                        |
| FePc-C <sub>60</sub> _900  | 0.97                        | 0.84                            | 4.53                                        |
| MFePc-C <sub>60</sub> _500 | 0.88                        | 0.74                            | 5.16                                        |
| FePc                       | 0.88                        | 0.75                            | 4.6                                         |
| Pt/C                       | 0.97                        | 0.87                            | 5.01                                        |

**Table S4.** The comparison of the ORR performance of the reported metal-doped C<sub>60</sub>-derived electrocatalysts in alkaline medium.

| Catalyst                   | $E_0$ (V) | $E_{1/2}$ (V) | $j_L$ (mA·cm <sup>-2</sup> ) | Ref.             |
|----------------------------|-----------|---------------|------------------------------|------------------|
| FePc-C <sub>60</sub> _500  | 1.04      | 0.91          | 5.05                         | <b>This work</b> |
| PD/N-C                     | 0.911     | 0.833         | 5.29                         | 1                |
| MFC <sub>60</sub> -130     | 0.82      | 0.76          | -                            | 2                |
| FMN700                     | 0.93      | 0.81          | -                            | 3                |
| Fe-MFC <sub>60</sub> -150  | 0.85      | 0.78          | -                            | 4                |
| C <sub>60</sub> @Co-N-PCM  | 0.98      | 0.85          | 5.5                          | 5                |
| Cu(15%)-MFC <sub>60</sub>  | 0.86      | 0.76          | 5.18                         | 6                |
| N,S-PCNFs                  | 0.969     | 0.837         | 5.50                         | 7                |
| N,S-PHCNSs-75              | 0.954     | 0.827         | 5.64                         | 8                |
| FNCNs-900                  | 0.976     | 0.851         | 6.21                         | 9                |
| C <sub>60</sub> /FeTPP-700 | -         | 0.877         | -                            | 10               |
| FeN/C <sub>60</sub> O-900  | 0.98      | 0.85          | 5.23                         | 11               |
| FeN@FCS-900                | 0.93      | 0.78          | 4.2                          | 12               |
| CoTPP/C <sub>60</sub> -800 | 0.93      | 0.824         | 5.5                          | 13               |
| FePc/FC                    | -         | 0.917         | -                            | 14               |
| CNO-900                    | 0.976     | 0.853         | 6.02                         | 15               |
| dFCMC                      | -         | 0.834         | -                            | 16               |

#### References for supporting information in Table S4

- [s1] J. Zhu, Y. Huang, W. Mei, C. Zhao, C. Zhang, J. Zhang, I. S. Amiin and S. Mu, *Angew. Chem. Int. Ed.*, 2019, **58**, 3859-3864.
- [s2] M. R. Benzigar, S. Joseph, H. Ilbeygi, D.-H. Park, S. Sarkar, G. Chandra, S. Umamathy, S. Srinivasan, S. N. Talapaneni and A. Vinu, *Angew. Chem. Int. Ed.*, 2018, **57**, 569.
- [s3] Z. Peng, Q. Jiang, P. Peng and F.-F. Li, *Eng. Sci.*, 2021, **14**, 27-38



- [s4] M. R. Benzigar, S. Joseph, G. Saianand, A.-I. Gopalan, S. Sarkar, S. Srinivasan, D.-H. Park, S. Kim, S. N. Talapaneni, K. Ramadass and A. Vinu, *Microporous Mesoporous Mater.*, 2019, **285**, 21-31.
- [s5] J. Wu, S. Wang, Z. Lei, R. Guan, M. Chen, P. Du, Y. Lu, R. Cao and S. Yang, *Nano Res.*, 2021, **14**, 2596-2605.
- [s6] G. Saianand, A. I. Gopalan, J. C. Lee, C. I. Sathish, K. Gopalakrishnan, G. E. Unni, D. Shanbhag, V. Dasireddy, J. Yi, S. Xi, A. H. Al-Muhtaseb and A. Vinu, *Small*, 2020, **16**, e1903937.
- [s7] Z. He, P. Wei, N. Chen, J. Han and X. Lu, *Chem.-Eur. J.*, 2021, **27**, 1423-1429.
- [s8] Z. He, P. Wei, T. Xu, J. Han, X. Gao and X. Lu, *Mater. Chem. Front.*, 2021, **5**, 7873-7882.
- [s9] Z. He, Z. Zhou, P. Wei, T. Xu, J. Han, K. Huang, K. Guo, W. Huang, T. Akasaka, X. Lu, *Chem Asian J.*, 2023, **18**, e202200994.
- [s10] H. Wang, L. Cao, Y. Feng, J. Chen, W. Feng, T. Luo, Y. Hu, C. Yuan, Y. Zhao, Y. Zhao, K. Kajiyoshi, Y. Liu, Z. Li and J. Huang, *Chin. Chem. Lett.*, 2023, **34**, 107601.
- [s11] B. Jiang, S. Wang, F. Meng, L. Ju, W. Jiang, Q. Ji and H. D. Quan, *CrystEngComm*, 2022, **24**, 5783-5791.
- [s12] L. Ju, G. Hao, F. Meng, W. Jiang and Q. Ji, *J. Mater. Chem. A*, 2023, **11**, 25534-25544.
- [s13] A. Yu, Q. Huang, S. Gao, T. Xu, W. Zhang, N. Joshi, P. Peng, Y. Yang, F.-F. Li, *Carbon Future*, 2024, **1**, 9200009.
- [s14] J. Chen, M. Wang, L. Chen, K. Guo, B. Liu, K. Wang, N. Li, L. Bao and X. Lu, *Adv. Energy Sustainability Res.*, 2024, **5**, 2400010
- [s15] K. Guo, Z. He, S. Lu, P. Zhang, N. Li, L. Bao, Z. Yu, L. Song, X. Lu, *Adv. Funct. Mater.*, 2023, **33**, 2302100.
- [s16] N. Li, M. Li, K. Guo, Z. Guo, R. Wang, L. Bao, G.L. Hou, X. Lu, *Adv. Energy Mater.*, 2024, **14**, 2401008.

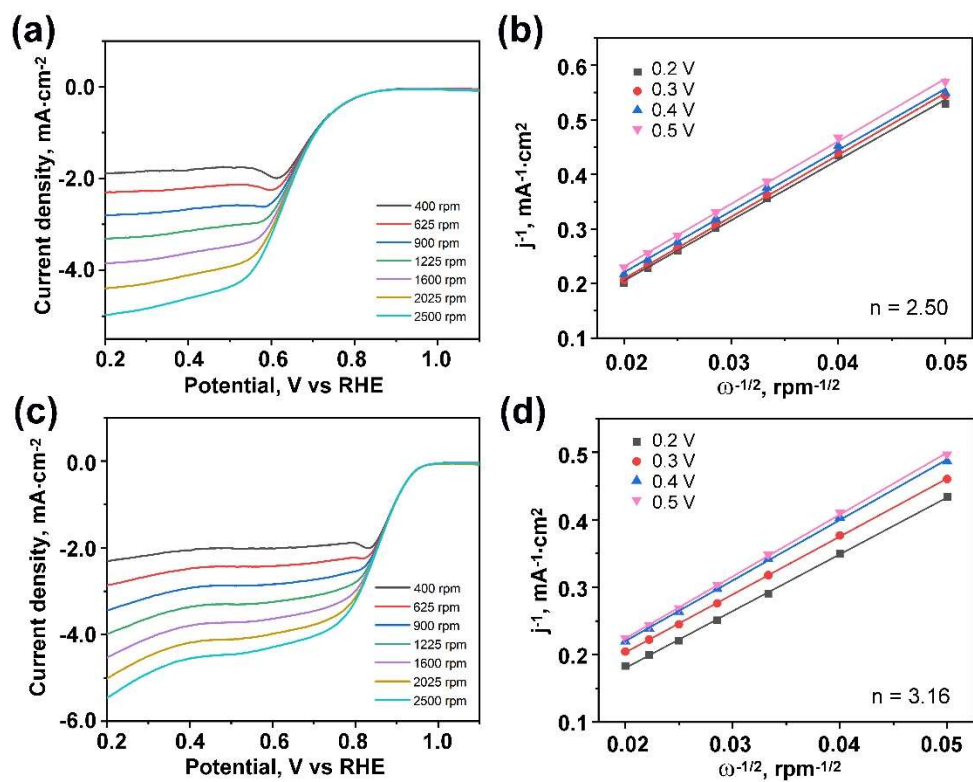

**Figure S21.** The LSV curves of (a) FePc-C<sub>60</sub>\_700 and (c) FePc-C<sub>60</sub>\_900 in O<sub>2</sub>-saturated 0.1 M KOH solution at different rotating rates. The K-L plots of (c) FePc-C<sub>60</sub>\_700 and (d) FePc-C<sub>60</sub>\_900 at different potentials.

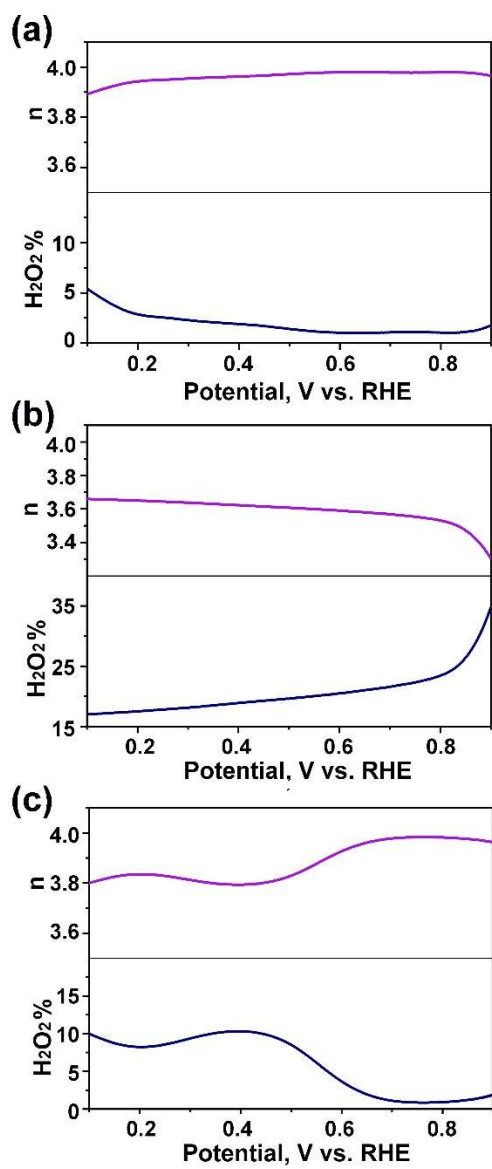

**Figure S22.** The electron transfer number ( $n$ ) and  $\text{H}_2\text{O}_2\%$  yield of (a) Pt/C, (b) FePc-C<sub>60</sub>\_700 and (c) FePc-C<sub>60</sub>\_900.

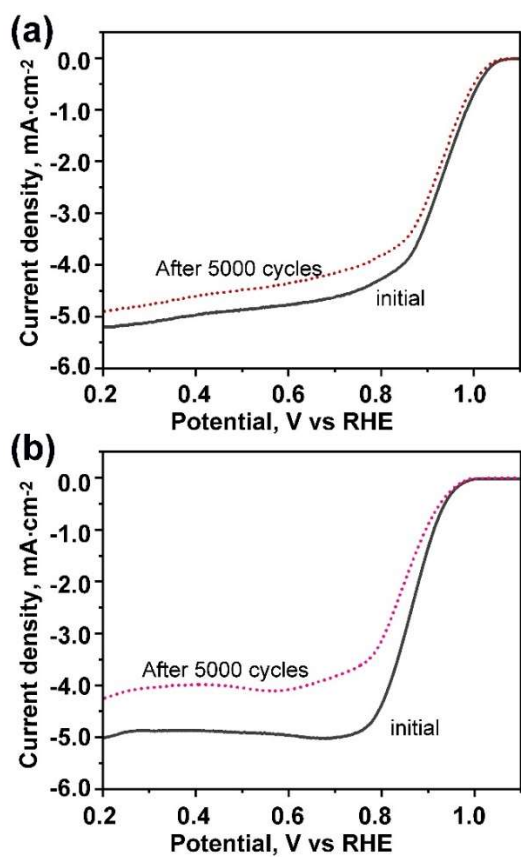

**Figure S23.** The LSV curves of (a) FePc-C<sub>60</sub>\_500 and (b) Pt/C in O<sub>2</sub>-saturated 0.1 M KOH solution at 1600 rpm before and after 5000 potential cycles.

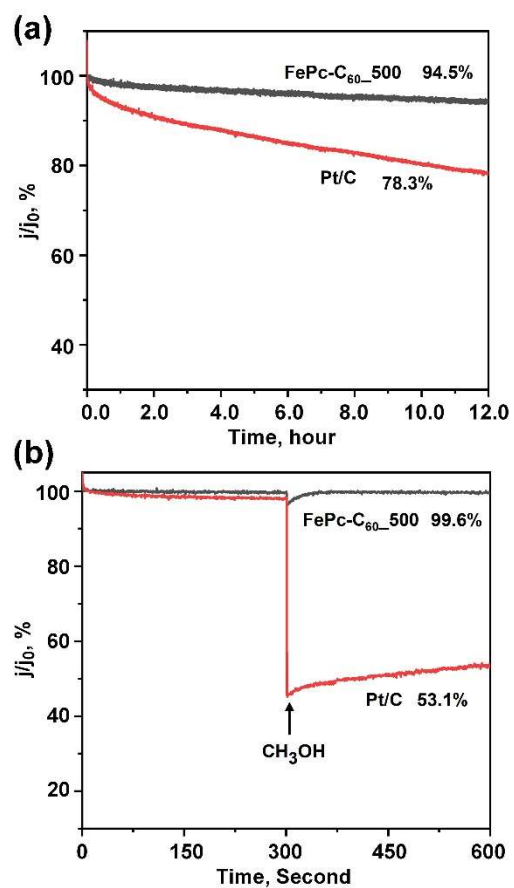

**Figure S24.** (a) The  $i-t$  response curves of FePc-C<sub>60</sub>\_500 and Pt/C. (b) The  $i-t$  response curves for the methanol immunity experiments of FePc-C<sub>60</sub>\_500 and Pt/C.
